# Supplementary material
Source: publisher figshare collection journal article supplement (https://frontiersin.figshare.com/ndownloader/files/35578142)
Supplement: Supplementary file [file 35578142]

## Supplementary Material

**Table S1:** HTLV-1 and HTLV-2 nucleotide sequences deposited in GenBank and used as references in this study.

| Access number | Types and subgroups | Isolate      | Geographic origin |
|---------------|---------------------|--------------|-------------------|
| DQ070891      | 1aA                 | SNT43        | Brazil            |
| KY928524      | 1aA                 | BRSP71066-15 | Brazil            |
| DQ005547      | 1aA                 | FNN100       | Brazil            |
| DQ005550      | 1aA                 | FNN153       | Brazil            |
| Y16475        | 1aA                 | Qu1_Peru     | Peru              |
| Y16479        | 1aA                 | Me2_Peru     | Peru              |
| AY818430      | 1aA                 | 2472LE       | Cameroon          |
| D23694        | 1aA                 | Ainu         | Japan             |
| KY928524      | 1aA                 | CA423        | Brazil            |
| KY928525      | 1aA                 | BRSP87092-14 | Brazil            |
| EU108722      | 1aA                 | CA253        | Brazil            |
| EU108721      | 1aA                 | CA422        | Brazil            |
| U53074        | 1aB                 | TA6          | Taiwan            |
| U53075        | 1aB                 | TA7          | Taiwan            |
| LC210070      | 1aB                 | JPNBr177     | Japan             |
| J02029        | 1aB                 | ATK          | Japan             |
| M37299        | 1aB                 | H5           | Japan             |
| KJ544830      | 1aC                 | PH906        | Senegal           |
| D23693        | 1aC                 | GH78         | Japan             |
| D13784        | 1aC                 | HS35         | Caribbean islands |
| U12804        | 1aD                 | Bo           | Algeria           |
| U12805        | 1aD                 | OD           | Mauritania        |
| DQ235698      | 1aD                 | BD89112      | Senegal           |
| AY818427      | 1b                  | 1503MV       | Cameroon          |
| AY026855      | 1b                  | 2656ND       | Central Africa    |
| AY818423      | 1b                  | 979MO        | Cameroon          |
| AY818425      | 1b                  | 1380MV       | Cameroon          |
| AY818426      | 1b                  | 1443MV       | Cameroon          |
| AY818429      | 1b                  | 1842LE       | Cameroon          |
| AY818432      | 1b                  | 2810YI       | Cameroon          |
| AY818433      | 1b                  | 1127MO       | Cameroon          |
| AY818424      | 1b                  | 1259NG       | Cameroon          |

## Supplementary Material

|          |    |              |                          |
|----------|----|--------------|--------------------------|
| Y17016   | 1b | Lib1         | Gabon                    |
| Y17017   | 1b | Lib2         | Gabon                    |
| L76307   | 1b | PH236        | Gabon                    |
| L76306   | 1b | SDen         | Gabon                    |
| Z32527   | 1b | ITIS         | Congo/Zaire              |
| L76312   | 1b | H23          | Cameroon                 |
| L02534   | 1c | Me15         | Melanesia                |
| L76310   | 1d | PYG19        | Central African Republic |
| Y17014   | 1e | Efe1         | Congo/Zaire              |
| U10258   | 2a | NOR2N        | Norway                   |
| JN247462 | 2a | LA8A         | Indonesia                |
| JN247456 | 2a | 09IDSKAH-1-2 | Indonesia                |
| JN247461 | 2a | PUEB_2       | Indonesia                |
| Y14365   | 2d | Pygmy2       | Congo/Zaire              |
| U10266   | 2b | SPAN130      | Spain                    |
| U10254   | 2b | ITA47A       | Italy                    |
| AY442388 | 2b | SP25         | Spain                    |
| L77237   | 2b | DP           | Southern Europe          |
| L77242   | 2b | 130          | Southern Europe          |
| L77240   | 2b | JL           | Southern Europe          |
| L77243   | 2b | 324          | Southern Europe          |
| L77244   | 2b | RVP          | Southern Europe          |
| L77239   | 2b | JA           | Southern Europe          |
| L77241   | 2b | JAN          | Southern Europe          |
| AY622979 | 2b | PortVs       | Portugal                 |
| AY509602 | 2c | BH339        | Brazil                   |
| MH194240 | 2c | BrPa_Kat116  | Brazil                   |
| MH194234 | 2c | BrPa_Dju214  | Brazil                   |
| U10253   | 2c | BRAZ.A21     | Brazil                   |
| L42509   | 2c | KAY73        | Brazil                   |
| AF306730 | 2c | TYR8680      | Brazil                   |
| AF306728 | 2c | GTY9274      | Brazil                   |
| AF306734 | 2c | BBD4410      | Brazil                   |
| KX198746 | 2c | PI46         | Brazil                   |
| AF306724 | 2c | Bel3948      | Brazil                   |
| AY920499 | 2c | Bel-11935    | Brazil                   |
| AY920500 | 2c | Bel-11507    | Brazil                   |
| GU573734 | 2c | Bel-10562    | Brazil                   |
| KY928552 | 2c | BRSP96617-14 | Brazil                   |
| KY928551 | 2c | BRSP92116-1  | Brazil                   |
| AF306726 | 2c | BEL9083      | Brazil                   |

**Table S2:** Evolutionary models and other information used to reconstruct phylogenetic trees and identify HTLV-1 and HTLV-2 subtypes and subgroups in this study.

|                                   |                                                                                                                      |
|-----------------------------------|----------------------------------------------------------------------------------------------------------------------|
| <b>HTLV-1:</b>                    |                                                                                                                      |
| Model of nucleotides substitution | HKY85                                                                                                                |
| Log-likelihood                    | -1429.86578                                                                                                          |
| Discrete gamma model              | Yes                                                                                                                  |
| Gamma shape parameter             | 0.149                                                                                                                |
| Transition/transversion ratio     | 10.906310                                                                                                            |
| <b>HTLV-2:</b>                    |                                                                                                                      |
| Model of nucleotides substitution | GTR                                                                                                                  |
| Log-likelihood                    | -1176.16034                                                                                                          |
| Discrete gamma model              | Yes                                                                                                                  |
| Gamma shape parameter             | 0.253                                                                                                                |
| GTR relative rate parameters      | A <-> C: 0.71638<br>A <-> G: 5.71992<br>A <-> T: 0.05875<br>C <-> G: 0.80443<br>C <-> T: 3.64217<br>G <-> T: 1.00000 |

**Figure S1:** Schematic representation of 15 families that have a person who used illicit drugs (PWUD) with HTLV-1/HTLV-2 infection in northern Brazil.

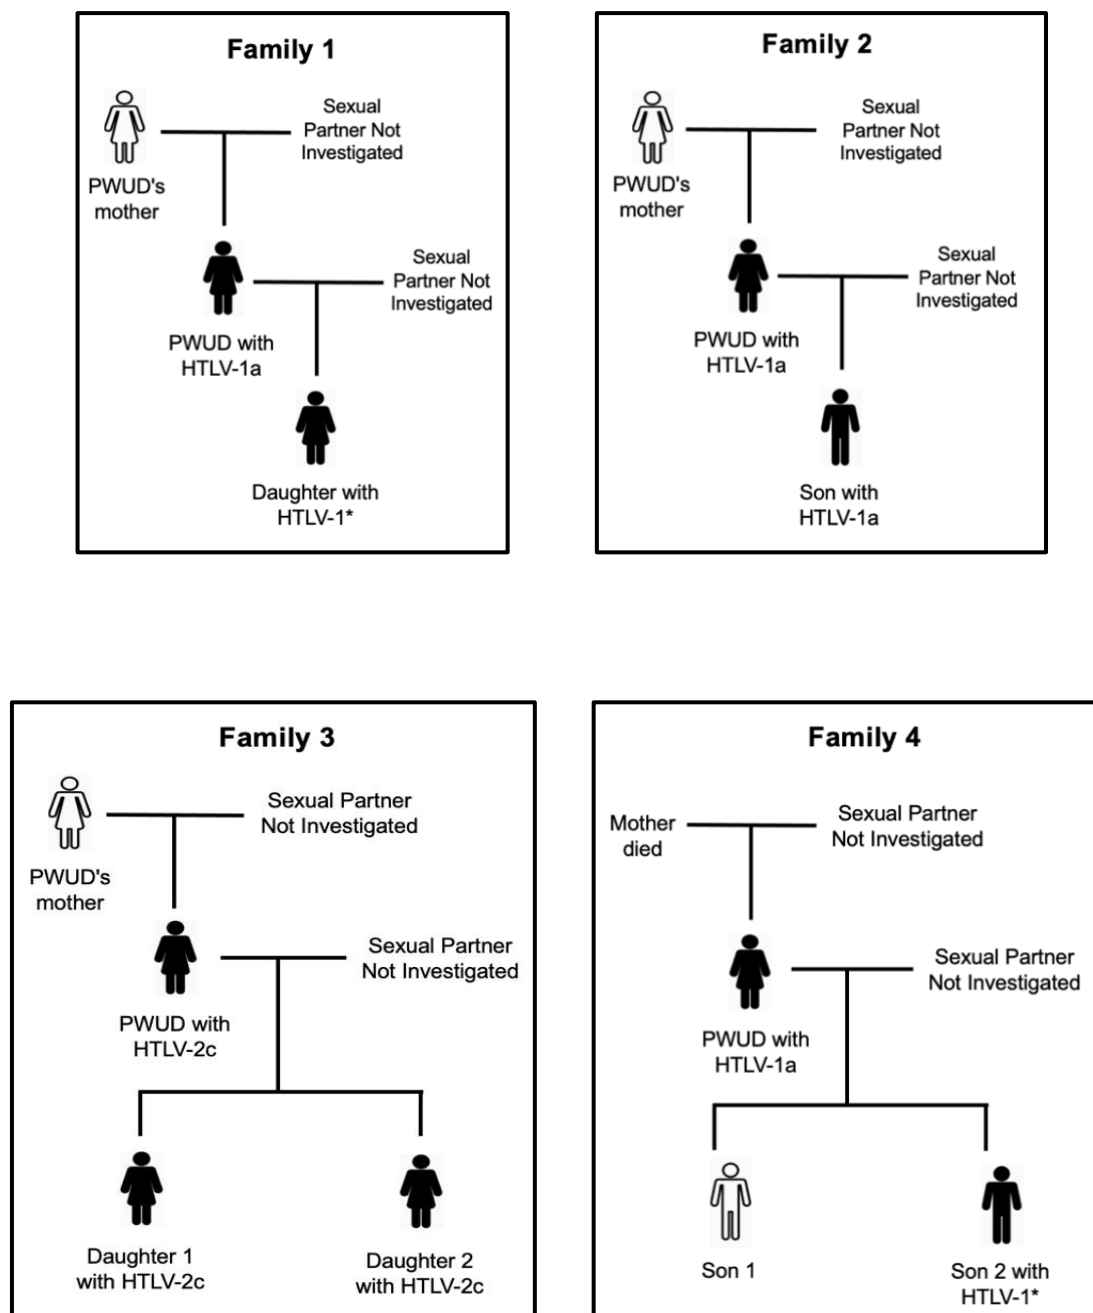

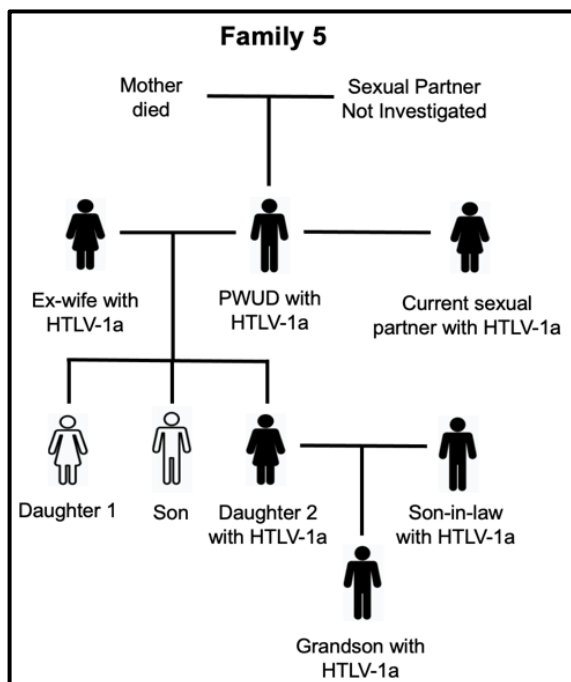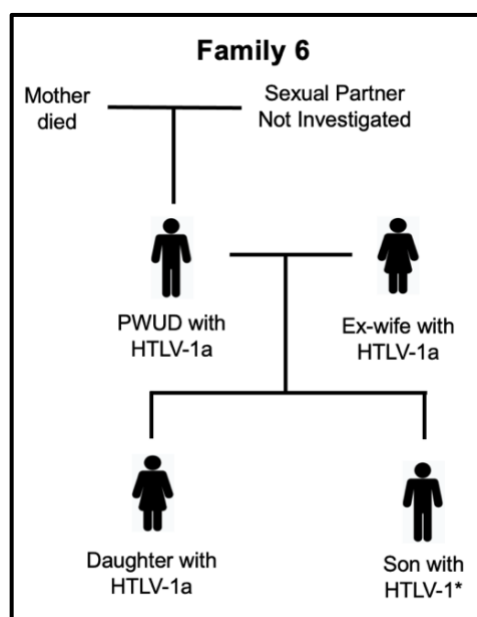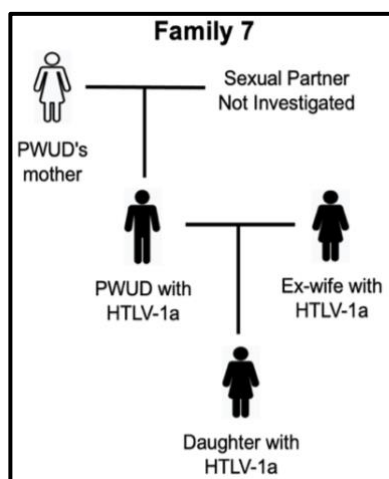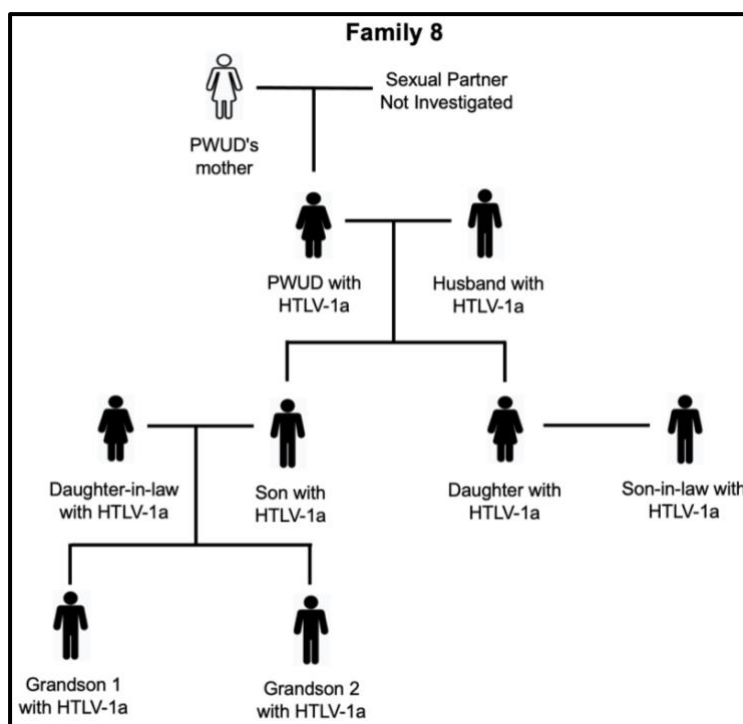

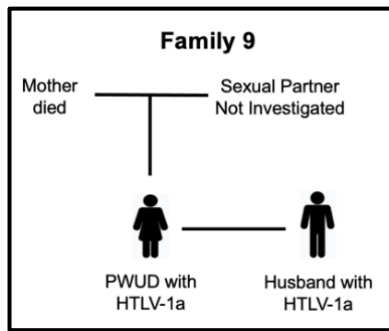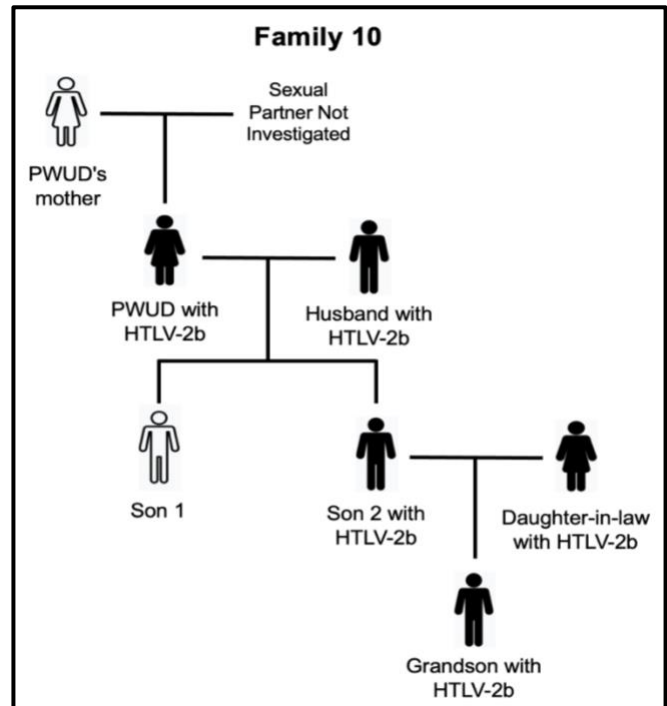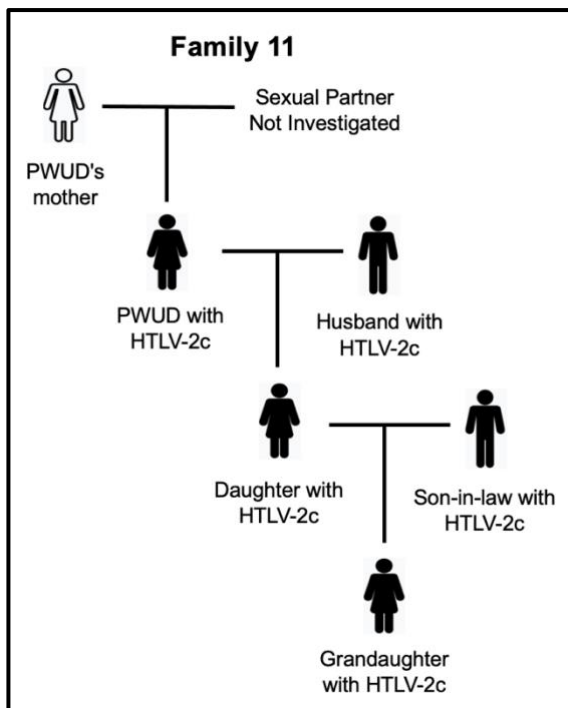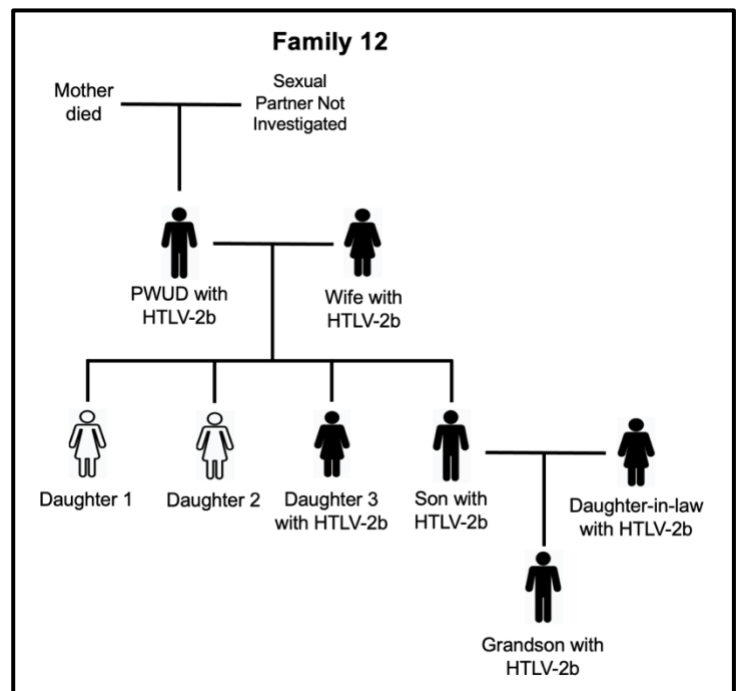

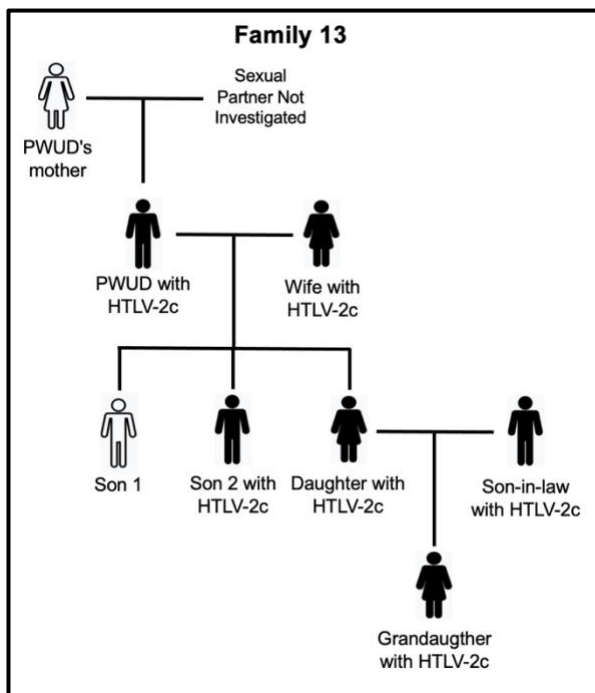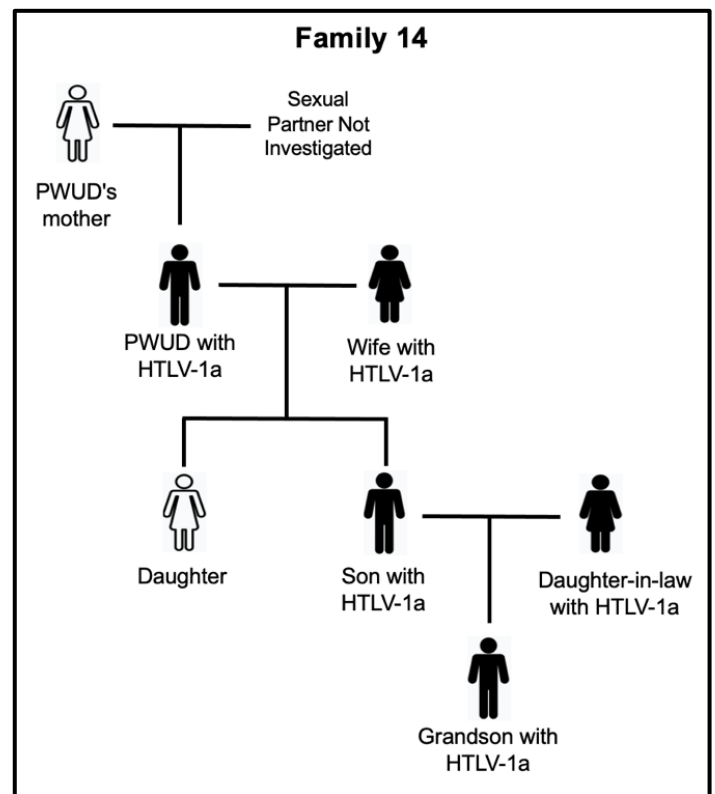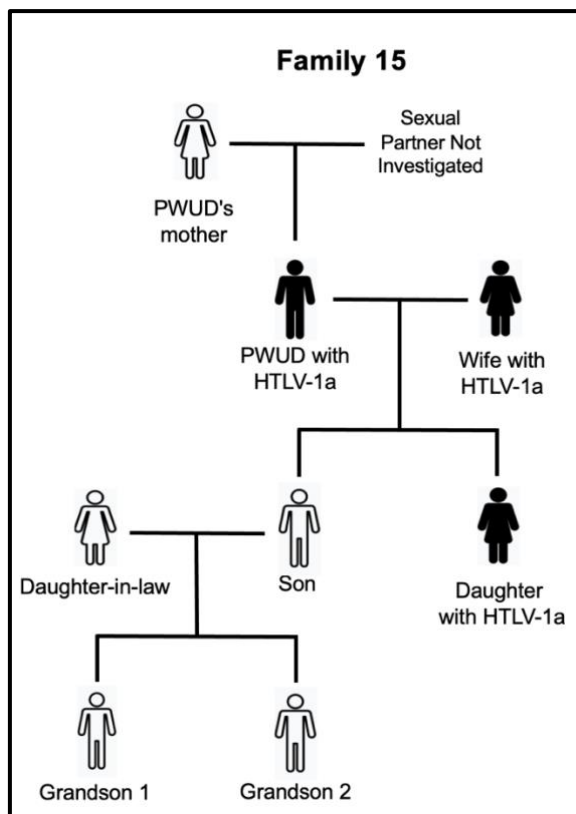

\* Proviral DNA was not detected in this participant's sample.
